# Supplementary material for: Valley polarization and p-/n-type doping of monolayer WTe2 on top of Fe3O4(111)
Source: Royal Society of Chemistry journal article supplement (doi:10.1039/c6cp01986b), 2016-01-01
Supplement: c6cp01986b1.pdf [file c6cp01986b1.pdf]

## Supplementary Information

### Valley Polarization and *p*-/*n*-Type Doping of Monolayer WTe<sub>2</sub> on Top of Fe<sub>3</sub>O<sub>4</sub>(111)

Yan Song,<sup>a</sup> Qian Zhang,<sup>a</sup> Wenbo Mi,<sup>\*a</sup> Xiaocha Wang<sup>b</sup>

*<sup>a</sup>Tianjin Key Laboratory of Low Dimensional Materials Physics and Preparation  
Technology, Faculty of Science, Tianjin University, Tianjin 300354, China*

*<sup>b</sup>Tianjin Key Laboratory of Film Electronic & Communicate Devices, School of  
Electronics Information Engineering, Tianjin University of Technology, Tianjin  
300384, China*

---

\*Author to whom all correspondence should be addressed.

E-mail: [miwenbo@tju.edu.cn](mailto:miwenbo@tju.edu.cn)

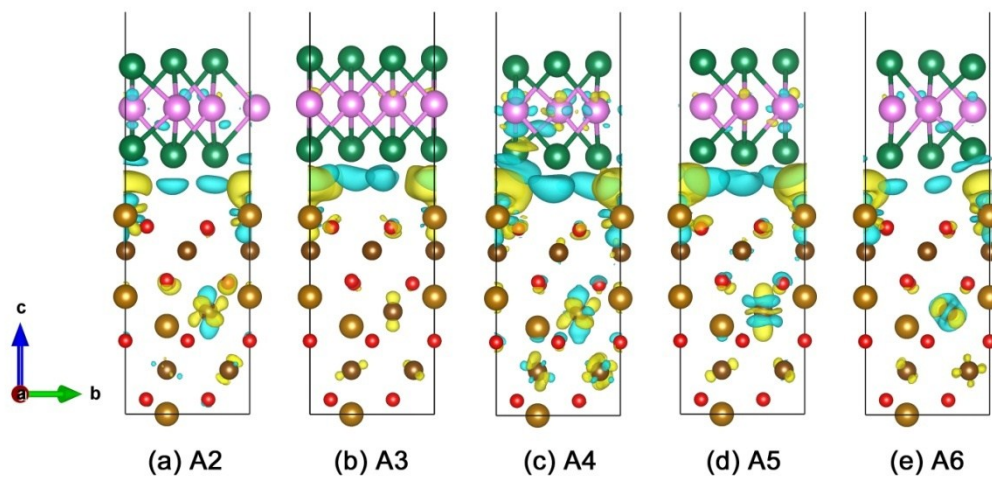

**Fig. S1.** Side views of charge density differences for A2-A6 models. The isosurface values for A2 and A6 models are  $2 \text{ e/nm}^3$  and for A3-A5 models are  $1 \text{ e/nm}^3$ . Yellow (blue) regions represent net charge gain (loss).

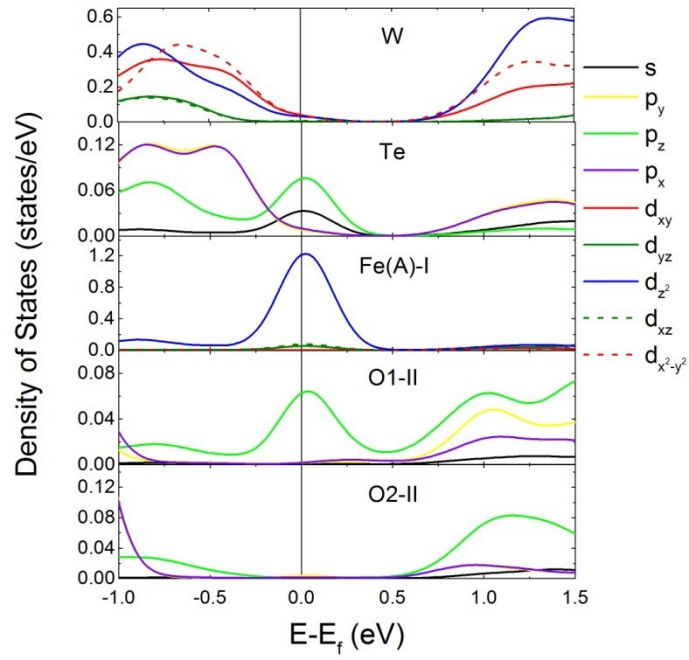

**Fig. S2.** The orbital-resolved DOS for W, Te, Fe(A)-I, O1-II and O2-II atoms in A4 model, respectively. Fermi energy is indicated by the vertical line and is set to zero.

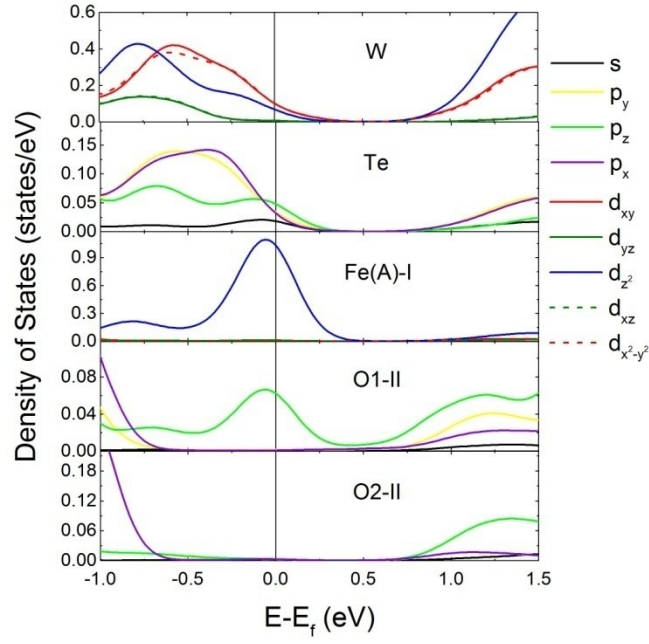

**Fig. S3.** The orbital-resolved DOS for W, Te, Fe(A)-I, O1-II and O2-II atoms in A5 model, respectively. Fermi energy is indicated by the vertical line and is set to zero.

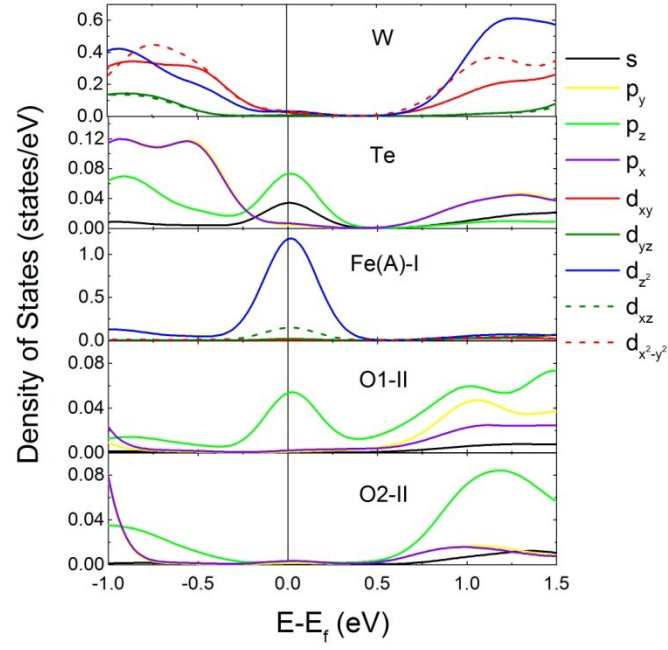

**Fig. S4.** The orbital-resolved DOS for W, Te, Fe(A)-I, O1-II and O2-II atoms in A6 model, respectively. Fermi energy is indicated by the vertical line and is set to zero.
